# Supplementary material for: One bout of neonatal inflammation impairs adult respiratory motor plasticity in male and female rats
Source: eLife journal article supplement (doi:10.7554/elife.45399), 2019-03-22
Supplement: supp [file elife-45399-supp-v1.zip]

Archive with 11 entries (11 files):
- elife_poa_e45399_Figure_1_source_data_1.xlsx
- elife_poa_e45399_Table_2_source_data_1.xlsx
- elife_poa_e45399_Table_1_source_data_1.xlsx
- elife_poa_e45399_Transparent_Reporting_File.pdf
- elife_poa_e45399_Figure_4_source_data_1.xlsx
- elife_poa_e45399_Figure_5_source_data_1.xlsx
- elife_poa_e45399_Figure_7_source_data_1.xlsx
- elife_poa_e45399_Figure_2_source_data_1.xlsx
- elife_poa_e45399_Figure_8_source_data_1.xlsx
- elife_poa_e45399_Figure_3_source_data_1.xlsx
- elife_poa_e45399_Figure_6_source_data_1.xlsx
