# Supplementary material for: One bout of neonatal inflammation impairs adult respiratory motor plasticity in male and female rats
Source: eLife journal article supplement (doi:10.7554/elife.45399), 2019-03-22
Supplement: supp [file elife-45399-supp-v1.zip › elife_poa_e45399_Figure_1_source_data_1.xlsx]

## Sheet: Sheet1
Male weights																																		Female Weights
P4		P7		P14		P21		P28		P35		P42		P49		P56		P63		P70		P77		P84		P91		P98		P105				P4		P7		P14		P21		P28		P35		P42		P49
Saline	LPS	Saline	LPS	Saline	LPS	Saline	LPS	Saline	LPS	Saline	LPS	Saline	LPS	Saline	LPS	Saline	LPS	Saline	LPS	Saline	LPS	Saline	LPS	Saline	LPS	Saline	LPS	Saline	LPS	Saline	LPS			Saline	LPS	Saline	LPS	Saline	LPS	Saline	LPS	Saline	LPS	Saline	LPS	Saline	LPS	Saline	LPS
10.4	10.4	19	15.2	30.3	25.2	44	41	90	71	127.5	114	172	157	227	214	258	238	281	263.5	319.5	289	320	311.5	342.5	320	349	337	367	352	376	372			9.6	10.1	18.3	16.7	29.7	24	41	37	75	69.5	107	104.5	141	140	167	164
10.4	10.6	17.9	15.3	27.5	23.6	49	40	86	70	135.5	111.5	170.5	154.5	233	211.5	266.5	240	294	264.5	303.5	287.5	326	306	345.5	318.5	351	333	367	354	332	359			10.7	10.7	20.7	14.2	29	24	46	37	75	64.5	107	101	154	128	174	167
11.4	10.1	21.6	14	29.5	24.5	46	37	82.5	70	118.5	117	161.5	156	235.5	208	272	230	285.5	270.5	308	286	339	305.5	334.5	315.5	320	332	332	347		3363			10	10.5	19.1	14.8	30	24.6	42	37	73	67	114	98	140	139	174	163
10.8	10.4	20.1	16	29.4	21.2	43	36	79.5	77	125	115.5	183.5	161.5	216	208	248.5	237.5	284	266.5	309	282	316	304	334.5	314	354	318	369	307		316			9.4	10.6	20.7	12.1	31	25.9	45	35	73.5	71	114	103.5	143	141.5	175	165.5
10.9	9.1	18.9	17.2	27.8	24.7	46	37	84.5	73	130	114	179.5	156	227	207.5	259.5	235	271	262	291	281	316	303.5	306	299	319	337	368						11.2	10.6	19.3	16.6	27.1	23.8	43	33	76	69.5	106.5	105	141	135	169	164.5
8.7	10.6	20.3	16.5	28.6	26.2	44	36	85	70	125.5	109.5	172	169	223	205	259.5	238	280	261	300	289	324	308	325	308	350	335							10.9	10.5	20.8	16.1	29.7	23.4	41	36	78.5	60.5	109	106.5	150	137	165	157
10.2	13.2	13	15	34	29	44	48.5	82	98	140	158.5	186	215	245	270	283	305	318	330	349	318	312	291	343	353	351	341							10.9	10.4	11	12	32	28	52	44.5	89	88	130	121	164	180	186	159
14.5	13.3	16	15	32	31	41.5	54.5	84	86.5	138	136	195	188	236	231	274	265	303	293	332	345	312	291	335	331	371	300							8.1	10.2	15	15	28	31	51.5	49.5	88	78	134	135	162	134	190	195
7.8	12.5	20	15.6	26	26	53.5	47	89	87	154.5	144	208	200	245	236.5	307	283	331	314	366	297	300	320	343	336	356	351							9.2	9.7	18	11	28	29	49	34.5	83	63	116	101	141	157	176	177
10.8	11.8	13	15.8	27	29	52	51	99	90	142	142	193	197	262	236.5	295	286	316	286	308	255	343	378	316	338	351	343							10.7	11.1	17	13	24	30	42	44	73.5	81	112	119	143	148	172	184
9	8.2	13.5	9.8	28	15	48	43	92	80.5	142	119	193	143	237	195	270	219	306	248	288	261	346	348	333	331	366	337							8.5	10.1	14	9	31	21	45	45	76	78	120	122	147	156	167	169
11.6	12	13.9	6.7	24	29	40	47	89	65	145	127	200	161	231.5	168	281	224	269	271	284	294	335	348	341	334	362	350							9.5	11.7	18.5	15.7	25	29	47	48	85	84	115	119.5	162	153	162.5	164
11	10	13.8	11.5	28	22	41	49	75	81	120	122	165	174	203	180	241	240	244	254	289	283	306	319	311	291									8.8	9.2	18.1	13	24	26	51	44	74	75	120	127	142	146	176	180
9.9	12	13.3	8.2	24	27	46	35	84.5	73	127	105	162	148	218	192	244	251	262	276	273	330	338	312	339	330									11.2	11.6	18.4	13.4	30	29	49	43	72	78	112	113	142	160	156	173.5
7.6	9.7	13.7	10.6	25	27	46	49	78.5	80	122	111	172	160	217	195	247	236	264	282	286	327	314	331	361	331									11.5	8.6	18.9	11.2	29	18	42	41	73	60.5	119.5	96	148	136	170	153
10.4	10.5	12.6	7.6	27	27	44	45	83.5	75	129	135	174	165	201	224	244	270	258	298	306	310	314	325		359									8.5	8.5	14.6	10.1	25	26	41	45	83	68.5	125	111	150	131	166.5	152
10.9	9.3	13.1	10	29	24	46	41	80.5	88	130	120	169	179	214	227	230	267	269	299	278	307	329	322											10.5	10.7	14.6	11	28	24	40	31	66	76	102	104	133	125	155	160
11.5	9.3	14.6	11.2	23	23	41	48	77.5	85	133	135	177	169	210	208	231	270	282	299	349	297	295	319											9.1	8.9	14.7	10	29	24	40	46	69	73	105	109	140	139	159	160
10.7	10.3	10.7	10	27	28	43	47	82.5	77	117	136	166	181	224	207	255	253	251	284	326	318	320	322											9.5	11.2	14.2	14	27	27	39	43	70	82	108	110	132	140	163	159
8.6	10.7	13.3	14	24	26	50	40	72	85	125	124	158	180	200	220	243	252	295	284	327	295	314	311											12.2	9.7	17	12	26	23	38	40	71	71	105	111	149	143	166	167
9.4	10.4	14	15	24	24	49	31	86	122	133	122	196	149	225	199	274	247	323	217	308	287	302	281											12.7	9.6	16	15	28	23	45	40	71	72	107	113	146	144	164	160
8.5	10.4	13	13	25	21	42	36	81	107	140	107	184	173	232	223	290	268	300	307	280	300	300	325											10.2	7.8	18	12	25	24	48	40	70	74	119	122	137	148	155	162
12.2	12.2	16	11	23	29	48	50	90	79	135	128	185	177	240	222	270	278	303	300	299	300	336	295											7.8	11.4	14	11.5	26	19	40	33	78	110	121	110	131	146	153	172
12	12.5	12	11	29	27	44	45	87	76	131	119	188	169	227	227	272	271	308	306	297	303	333	334											8.5	12.1	10	12	28	22	46	34	80	110	101	110	131	122	175	146
10.8	8.9	16	12	28	29	47	45	143	83	143	121	189	176	241	213	283	261	318	288	321	296	346	316											8.1	10.7	12	9.5	23	24	40	26	77	91	113	91	148	141	149	163
11.7	12.1	15	13	27	27	41	49	134	85	134	129	192	162	236	230	283	289	285	315	295	298	322	327											8.6	11.2	12	13	27	27	37	50	125	81	125	116	150	146	161	186
11.8	12.2	17	13	28	29	47	42	85	82	135	122	168	173	213	240	264	294	280	297	307	293	355	298											7.5	8.5	15	15	29	28	40	48	115	72	115	113	153	158	169	171
11.2	11.2	15	15	30	27	44	46	87	85	125	133	169	184	214	227	259	273	278	321	280	260	362	326											11	7.7	15	11	28	28	39	47	120	76	120	116	142	147	153	167
11	10.4	15	14	30	24	46	44	89	88	132	133	172	165	217	216	256	266	296	292	299	296	329	362											11.7	9.5	15	13	25	25	40	50	116	76	116	125	158	140	159	175
10	10.4	16	14	27	27	47	48	81	79	124	131	179	172	230	223	268	262	310	293	301	273	338	316											11	8.3	14	14	28	28	46	48	78	77	122	107	150	143	175	178
11.8	11.6	14	14	28	31	49	48	82	83	140	121	177	173	222	219	282	259	321	289	304	321	331	329											11.1	9.9	14	13	28	28	48	47	76	76	126	110	143	141	171	159
8.94	11.5	17	12	27	31	44	53	79	88	125	122	193	168	233	228	277	246	299	277	285	311	334	324											10.3	9	15	13	28	26	50	45	78	80	117	112	148	141	162	167
9.3	11.6	15	15	26	31	46	53	81	86	127	129	180	168	248	215	295	246	263	272	313	319		313											9.2	8.2	15	12	27	27	49	44	78	84	116	114	145	127	178	160
8.7	12.4	19	12	28	31	48	53	84	89	128	119	178	172	212	208	240	229	283	261	309	289													9.9	9.8	15	14	27	27	51	38	81	68	115	109	156	144	167	160
10	11.4	17	14	27	28	46	51	80	78	121	132	168	167	228	224	256	238	270	266	331	308													8	6.8	15	24	26	22	45	38	71	66	108	104	164	155	165	169
9.1	8.3	17	11	26	30	49	51	77	80	122	118	175	146	211	214	248	244	270	267	320	337													9.6	10.2	13	19	26	24	44	33	85	69	120	91	159	145	172	145
9.1	9.8	17	13	27	27	48	50	83	81	127	130	184	161	216	218	246	249	300	280	319	310													9.3	9.7	19	23	26	25	53	40	79	58	104	102	155	151	176	155
8.2	10.3	18	13	28	25	50	42	85	79	131	119	178	177	216	216	272	254	273	283	335	299													9.8	8.9	16	23	30	24	45	40	80	72	117	100	143	146	152	160
9.2	9.4	18	13	26	25	49	41	84	75	135	115	161	183	239	213	246	249	285	281	338	299													9.6	9.4	16	24	27	24	46	61	75	97	115	136	143	147	165	175
9.6	8.5	16	10	27	26	45	43	81	87	126	115	174	205	233	212	233	257	288	277	329	307													8.4	11	16	22	27	38	42	63	69	105	120	134	147	156	171	162
9.6	9	16	13	27	23	48	33	90	80	137	113	179	193	242	208	243	247	284	279	304														8.9	11.3	28	15.89	26	33	47	64	69	88	121	132	159	200	185	166
9.6	8.2	25	25	26	26	50	43	69	84	127	116	205	201	220	182	255	241	259	240	324														8.9	9	27	12.91	24	41	44	68	59	94	105	129	152	181	167	178
10.8	9.8	31	24	27	26	48	43	76	83	120	97	209	262	204	167	237	217	283	276	321														10.4	9.6	28	16.58	27	38	38	66	68	92	106	137	151	188	158	167
11.7	10.5	27	24	25	24	50	39	78	82	126	119	205	297	218	11	252	255	273	280	316														12.3	11.5	29	14.03	25	40	47	58	71	100	106	131	158	175	161	163
10.2	9.5	28	24	29	23	44	43	78	84	132	107	204	254	213	193	258	232	280	254															9.5	9.6	28	16.45	45	39	65	42	96	69	138	100	207	190	188	199
10	10	18.8	13.95	27	43	52	75	77	107	112	159	251	295	213	248	233	268	257	295															9		16.3	13.78	42	27	71	46	105	75	147	88	205	203	178	189
9	9	16.98	13.83	26	41	49	71	63	118	124	166	302	264	195	238	257	265	283	297															12		18.9	13	44	27	68	42	108	77	145	101	212		171	204
	9.8	15.23	15.92	28	41	47	76	75	113	125	157	257		218	236	254	242	288	301															9.5		15.2	13	43	28	69	47	106	71	142	103	184		179	181
	11.6	16.65	16	27	41	49	77	67	107	123	166	254		213	218	253	280	302	267																	15.64	12	46	25	73	44	102	66	144	105	183		182	211
	10.3	17	12.91	47	25	88	43	107	84	177	117			244	277	272	299	312	298																	15.6	12	28	25	44	40	65	70	103	102	177		212	196
	11	19	14	46	28	80	41	102	82	173	116			246	318	279	331	298	312																	17.58	13	25	23	50	44	67	72	115	106			216	151
		17	13	51	26	80	44	102	77	182	125			245	289	278	288	307	281																	16	13	30	26	42	45	72	66	95	104			221	156
		18	14	47	25	80	42	108	74	175	113			241	320	266	301	323	289																	17		26	25	43	43	79	65	106	103			195	157
		17	14	27	28	42	44	76	76	145	124			283	287	307	342	314	290																	16		26	25	41	45	69	62	102	107			192	154
		17	14	26	28	47	43	80	75	124	123			334	219	258	248	291	273																	17		27	26	44	46	73	62	103	104			182	152
			13	25	26	50	56	91	64	121	122			277	203	294	270	304																		18		28	25	39	42	63	73	117	113			172	154
				30	25	45	51	79	72	123	127			273	191	297	240	299																		18		30	26	47		71		104				161
				28	28	55	51	76	67	127	135			223	205	282	254	307																				29		51		65		116				173
				30	27	56	48	82	89	141	125			229	207	272	240																					27		50		69		120				179
				28	28	50	52	90	65	129	127			220	201	264	245																					29		48		70		113				157
				28		50		73		138				220		263																						29		50		62		123				173
				30		55		66		127				212		263
				29		54		70		129				213		265
[truncated: 30 more columns]
