# Supplementary material for: One bout of neonatal inflammation impairs adult respiratory motor plasticity in male and female rats
Source: eLife journal article supplement (doi:10.7554/elife.45399), 2019-03-22
Supplement: supp [file elife-45399-supp-v1.zip › elife_poa_e45399_Figure_2_source_data_1.xlsx]

## Sheet: Sheet1
	maleP4 Saline								maleP4 LPS													femaleP4 Saline								femaleP4 LPS							TC
Baseline	0	0	0	0	0	0	0		0	0	0	0	0	0	0	0	0	0	0	0		0	0	0	0	0	0	0		0	0	0	0	0	0		0	0	0	0	0
15 min	83.22	-13.6388	-12.9985	14.0207	3.91462	13.1687	4.45963		2.39712	1.4514	-2.69428	-11.488	16.2239	-37.2449	2.76901	14.9021	-22.829	26.6603	51.0676	8.40416		123.46	84.041	19.361	65.502	31.7828	21.63	9.6667		-26.684	-100	-55.097	-30.066	3.03583	31.946		3.7235	24.7966	3.26844	0.446978	20.0122
30 min	79.8464	71.5874	-24.1934	29.5539	7.98552	3.37739	22.6231		9.85934	50.4418	13.8931	-26.8679	10.2706	-100	77.9809	-5.97948	-29.3919	-13.7625	36.0252	9.52113		25.102	148.94	21.999	153.46	58.4844	1.4611	43.223		2.9047	-100	-100	-15.878	-13.5921	23.801		0.052832	35.8008	-0.6898	-13.2959	20.6241
60 min	114.862	86.8274	37.3028	44.0465	23.8822	30.9188	48.9138		-100	69.6409	41.5508	14.9052	16.8876	1.94157	83.5899	7.50142	-12.824	-29.6948	63.7307	15.9139		66.562	166.93	49.565	205.63	60.5793	80.886	48.786		7.7365	-100	9.7287	-16.078	5.58443	5.08		4.38817	26.1818	-7.13288	15.7771	2.64514
