# Supplementary material for: One bout of neonatal inflammation impairs adult respiratory motor plasticity in male and female rats
Source: eLife journal article supplement (doi:10.7554/elife.45399), 2019-03-22
Supplement: supp [file elife-45399-supp-v1.zip › elife_poa_e45399_Figure_3_source_data_1.xlsx]

## Sheet: Sheet1
	maleP4 Saline					maleP4 LPS					femaleP4 Saline						femaleP4 LPS						TC
baseline	0	0	0	0		0	0	0	0		0	0	0	0	0		0	0	0	0	0		0	0	0	0
15m	-12.9	15.0979	-4.12	49.3602		-2.76426	17.2198	9.24281	-26.8727		8.7961	-1.26313	1.5704	43.5282	57.288		47.8123	84.0868	26.107	0.620132	67.3188		8.40326	9.45057	21.8392	25.4712
30m	13.9	21.9151	-3.89	25.097		-38.388	38.4869	48.3897	8.32446		41.6736	9.51867	-15.8855	26.67	90.758		85.6961	145.292	37.9301	73.2269	56.4228		41.8436	-6.97658	14.0861	43.1931
60m	55.6	56.0719	30.3	72.214		80.9786	53.1419	61.5742	36.6272		106.23	74.3797	36.1878	83.1317	144.28		141.631	169.09	101.19	59.5124	83.6437		5.65664	-23.5068	33.3318	36.9022
