# Supplementary material for: One bout of neonatal inflammation impairs adult respiratory motor plasticity in male and female rats
Source: eLife journal article supplement (doi:10.7554/elife.45399), 2019-03-22
Supplement: supp [file elife-45399-supp-v1.zip › elife_poa_e45399_Figure_4_source_data_1.xlsx]

## Sheet: Sheet1
	IL-6			IL-1B			COX2			TNFa			iNOS
	Saline	LPS		Saline	LPS		Saline	LPS		Saline	LPS		Saline	LPS
	1.85079	0.444767		1.14546	0.637231		0.542252	0.265016		0.583397			0.696517	0.515619
	1.22032	0.95532		0.504903	0.537004		0.478609	0.252324		0.855066			1.03401	0.384214
	0.447695	0.838863		0.966405	0.919271		0.455055	0.356352		1.42025	0.508581		1.16297	0.722749
	0.804717	0.629036		1.30402	0.585263		14.0025	0.141617		1.29992			1.74915	0.515143
		1.13309			1.82671			0.857855			1.94391			1.7236
		0.457471			1.22577			8.88203			1.08472			1.36013
	2.06077			0.670469			0.533783						0.747764
	2.62766	0.60536		1.12602	0.694485		0.502447	0.387779					0.549842	0.741281
	0.45004	1.78279		1.21132	1.01938		0.308688	0.554477		1.08582	0.90435		1.0527	0.952503
	0.504303	1.42864		1.50032	0.960359		7.30423	0.539885			1.11152		1.57704	0.888749
		0.293582			0.730895			0.317044			0.471056			0.776319
		0.388456			1.59194			9.70879			0.590241			0.98465
