# Supplementary material for: One bout of neonatal inflammation impairs adult respiratory motor plasticity in male and female rats
Source: eLife journal article supplement (doi:10.7554/elife.45399), 2019-03-22
Supplement: supp [file elife-45399-supp-v1.zip › elife_poa_e45399_Figure_5_source_data_1.xlsx]

## Sheet: Sheet1
	maleP4 Saline						maleP4 LPS					femaleP4 Saline					femaleP4 LPS					TC
Baseline	0	0	0	0	0		0	0	0	0		0	0	0	0		0	0	0	0		0	0	0	0	0
15 min	-5.42926	21.6264	34.1415	32.827	-27.8457		6.9366	5.2397	-5.3414	5.3106		26.485	137.47	86.378	94.305		20.9287	-15.0009	50.4028	21.9564		3.7235	24.7966	3.26844	0.446978	20.0122
30 min	11.9738	28.9935	48.944	136.02	-29.599		-11.506	9.1503	42.291	-22.78		24.058	150.26	105.18	140.05		23.1119	-22.1398	18.1824	69.1617		0.052832	35.8008	-0.6898	-13.2959	20.6241
60 min	33.392	93.2819	48.217	157.02	-26.674		-17.841	20.119	19.284	6.3021		37.499	144.14	126.57	101.57		8.90416	-47.8279	13.8921	26.7426		4.38817	26.1818	-7.13288	15.7771	2.64514
