# Supplementary material for: One bout of neonatal inflammation impairs adult respiratory motor plasticity in male and female rats
Source: eLife journal article supplement (doi:10.7554/elife.45399), 2019-03-22
Supplement: supp [file elife-45399-supp-v1.zip › elife_poa_e45399_Figure_6_source_data_1.xlsx]

## Sheet: Sheet1
	maleP4 Saline						maleP4 LPS						femaleP4 Saline						femaleP4 LPS							TC
baseline	0	0	0	0	0		0	0	0	0	0		0	0	0	0	0		0	0	0	0	0	0		0	0	0	0
15m	15.1	16.1889	43.3	-0.2965	15.2377		32.6	46.6241	35.7	-17.506	10.2203		51.4	119.184	103	95.845	16.4415		4.7	12.1267	7.97	48.5686	23.971	82.42		8.40326	9.45057	21.8392	25.4712
30m	26.5	43.9648	61.1	32.907	27.0962		30.3	45.3167	85.6	-6.57076	25.478		63.1	153.147	139	186.55	59.9422		-19.7	33.1855	2.33	49.6742	12.1438	82.2749		41.8436	-6.97658	14.0861	43.1931
60m	33.8	70.5969	82.9	80.6251	44.8606		-6.4	-100	79.5	6.19032	18.5531		127	116.845	131	166.35	107.245		-19.4	13.0209	14.5	71.3199	36.5958	35.9267		5.65664	-23.5068	33.3318	36.9022

## Sheet: Sheet2
	maleP4 Saline													maleP4 LPS													femaleP4 Saline													femaleP4 LPS
Baseline	0	0	0	0										0	0	0	0	0	0								0	0	0	0										0	0	0	0	0	0
15 min	5.19663	3.4745	7.0134	10.8667										-15.5797	7.55841	10.611	54.868	23.4815	77.0887								22.9551	30.9737	45.8486	82.4253										32.526	29.5561	44.0249	80.6972	39.7545	55.2594
30 min	45.9669	54.0322	-6.93858	28.0003										30.9154	67.5171	53.2948	141.653	38.7329	88.9114								82.6695	53.4719	98.5387	110.673										60.3244	84.3123	73.5371	119.891	37.7834	104.7
60 min	119.919	61.4268	76.8925	60.5144										8.52252	80.3424	125.691	212.675	53.1262	124.545								109.108	88.6676	149.196	145.254										114.688	167.114	174.951	165.328	49.7676	77.4418
90 min	114.326	131.634	97.0239	97.0223										-6.41029	59.7883	79.6781	176.298	65.7252	135.21								88.1681	96.1717	191.633	131.176										118.217	129.172	278.987	178.54	104.331	70.0792
