# Supplementary material for: One bout of neonatal inflammation impairs adult respiratory motor plasticity in male and female rats
Source: eLife journal article supplement (doi:10.7554/elife.45399), 2019-03-22
Supplement: supp [file elife-45399-supp-v1.zip › elife_poa_e45399_Figure_8_source_data_1.xlsx]

## Sheet: Sheet1
preBotc	Male				Female
GFAP	P4 Saline	P4 LPS			P4 Saline	P4 LPS
	% change	% change			% change	% change
	88.0815	108.091			81.9133	117.238
	111.919	114.554			104.922	114.508
		106.646			113.165
	97.8312	81.1169			106.683	83.7275
	80.4725	87.2079			89.2012	85.0391
	121.696	120.49			104.116
					59.4683
preBotc	Male				Female
IBA1	P4 Saline	P4 LPS			P4 Saline	P4 LPS
	% change	% change			% change	% change
	88.9062	103.02			85.5889	111.688
	111.094	76.4115			128.611	96.3745
	103.093	97.7193			85.7997
	95.9954	101.955			99.6625	105.561
	100.911	105.952			99.823	109.486
		112.121			100.515
					104.829
Spinal Cord	Male				Female
GFAP	P4 Saline	P4 LPS			P4 Saline	P4 LPS
	% change	% change			% change	% change
	109.53	73.2831			103.865	105.814
	90.4699	87.0279			96.1348	116.21
	100	92.2808			113.434	100.955
	100	98.7249			72.1742
	100	97.9011			114.391
		82.1409			100
Spinal Cord	Male				Female
IBA1	P4 Saline	P4 LPS			P4 Saline	P4 LPS
	% change	% change			% change	% change
	82.5505	118.672			105.292	103.008
	117.449	119.383			94.7081	112.795
	100	97.2165			90.1665	91.516
	100	78.7609			116.215
	100	99.143			93.6186
		85.4352			100
		92.0584
