# Supplementary material for: One bout of neonatal inflammation impairs adult respiratory motor plasticity in male and female rats
Source: eLife journal article supplement (doi:10.7554/elife.45399), 2019-03-22
Supplement: supp [file elife-45399-supp-v1.zip › elife_poa_e45399_Table_1_source_data_1.xlsx]

## Sheet: Sheet1
moderate Hypoxia
	Saline								LPS											Saline + Keto						LPS + Keto
Male	116.544	153.971	105.103	48.1814	173.844	94.4451	104.271		37.4558	57.4936	77.5561	88.6273	163.995	75.0029	90.3514	122.288	91.3121	123.536		155.225	103.519	75.0759	137.371			181.565	90.843	87.8777	110.027
Female	231.071	170.434	227.148	102.3	230.619	149.748			74.7185	247.951	189.595	136.321	96.7277	143.567						252.004	136.925	122.306	141.823	170.031		274.011	271.999	130.308	95.1178	171.139
Seveere Hx
	Saline								LPS											Saline + Keto						LPS + Keto
Male	184.611	116.768	140.798	89.1116	161.635				108.081	93.4723	104.019	118.575								160.34	116.059	143.659	184.187	152.203		188.69	335.636	113.537	125.711	108.22
Female	121.323	140.687	72.2495	354.909					206.493	175.374	160.078	145.901								187.172	184.247	227.542	244.11	127.607		218.137	280.432	162.973	175.969	326.418	248.696
