# Supplementary material for: One bout of neonatal inflammation impairs adult respiratory motor plasticity in male and female rats
Source: eLife journal article supplement (doi:10.7554/elife.45399), 2019-03-22
Supplement: supp [file elife-45399-supp-v1.zip › elife_poa_e45399_Table_2_source_data_1.xlsx]

## Sheet: Sheet1
	Temperature									PaO2 (mmHg)									PaCO2 (mmHg)									pH									Mean Arterial Pressure (MAP)
	Male				Female					Male				Female					Male				Female					Male				Female					Male				Female
	Baseline	Hypoxia	60min post AIH		Baseline	Hypoxia	60min post AIH			Baseline	Hypoxia	60min post AIH		Baseline	Hypoxia	60min post AIH			Baseline	Hypoxia	60min post AIH		Baseline	Hypoxia	60min post AIH			Baseline	Hypoxia	60min post AIH		Baseline	Hypoxia	60min post AIH			Baseline	Hypoxia	60min post AIH		Baseline	Hypoxia	60min post AIH
Neonatal Saline + mAIH	37.6	37.3	37		37.6	37.6	37.6			256	36.8	232		223	43.9	244			43.9	43.8	44.8		51.7	51.9	52.5			7.32	7.28	7.36		7.36	7.36	7.36			130	111	112		145	122	144
	37.4	37.3	37		37.4	37.4	37.4			286	40.7	275		303	39.5	283			46.9	46.8	47.9		45.2	44.8	44.7			7.36	7.35	7.37		7.37	7.39	7.36			137	53.7	117		112	46	120
	37.3	37.4	37.7		37.5	37.5	37.5			240	36.1	234		211	38	230			45.1	44.3	44.4		49.6	50.3	49.2			7.37	7.34	7.37		7.35	7.31	7.34			126	50.5	117		129	86.6	134
	37.3	37.4	37.8		37.3	37.3	37.3			227	37.8	250		220	35.7	257			45.1	42.4	43.9		55	55	54.2			7.37	7.35	7.35		7.34	7.33	7.31			117	45.3	102		114	47.7	107
	37.7	37.7	37.8		36.9	36.9	36.9			249	38.6	240		338	41.5	291			30.7	31.1	30.8		45.1	45.9	45.3			7.49	7.5	7.48		7.32	7.4	7.38			118	61.7	116		89.7	39.1	70.3
	37	37.5	37.9		37.6	37.6	37.6			271	35.9	227		215	42.1	250			44.8	44.3	44.5		45.8	45.3	45.4			7.4	7.38	7.4		7.38	7.37	7.37			131	49.7	129		135	66.2	142
	37.2	37.2	37.5		37.4	37.4	37.4			247	39.2	182		302	40.4	257			45.6	42.6	47.2		49.7	48.7	48.8			7.31	7.28	7.35		7.37	7.35	7.34			111	64.5	106		119	45.6	99.4
Neonatal LPS + mAIH	37.6	37.4	37.5		37.5	37.4	37.4			304	36.2	267		249	42.9	271			35.7	35.7	36.5		45.9	47	46			7.43	7.41	7.45		7.36	7.34	7.37			105	62.4	88.1		130	65.4	133
	37.4	36.8	37.1		37.3	37.3	37.4			247	40.5	256		249	43.1	285			46.2	45.3	45		45.7	46.8	46.4			7.32	7.34	7.36		7.37	7.37	7.38			128	49.5	115		140	103	138
	37.5	37.3	37.2		37.4	37.4	37			284	36.3	235		247	42.7	290			39	38.5	38		46	46.6	47.4			7.42	7.35	7.43		7.35	7.34	7.36			128	69.3	129		131	97.6	120
	37.6	37.8	37.4		37.8	37.2	37.4			273	39.9	269		287	35.9	243			41.6	40.8	42		41.6	40.7	40.5			7.37	7.33	7.4		7.36	7.37	7.36			132	46.2	120		78.3	48.6	77
	37.9	37.8	37.7		37.6	37.5	37.8			250	41.9	254		305	36.9	282			42.4	43.4	42.7		44.1	43.4	44			7.35	7.35	7.4		7.38	7.39	7.39			133	80.3	117		137	73.3	145
	37.9	37.9	37.4		37.5	37.4	37.5			273	36.2	269		273	35.4	236			35.7	37.1	36.9		46.4	48.1	46.9			7.45	7.45	7.44		7.38	7.36	7.37			141	86.6	135		120	91.7	114
	37.5	37.9	37.2							280	37.1	246							45.2	44.7	45.3							7.38	7.36	7.35							121	59.4	106
	37.1	37	37.8							270	35.9	225							47.9	48.8	48.5							7.32	7.33	7.33							116	54	96.2
	37.4	37.4	37.9							284	40.3	236							42.8	43.2	42.2							7.33	7.34	7.37							132	113	118
	37.8	37.7	37.5							196	38.6	227							51.9	52.7	51.3							7.32	7.32	7.33							133	62.1	125
	37.6	37.4	37.7							298	41.6	271							42.2	40.9	42.7							7.36	7.32	7.36							133	62.1	125
	37.5	37.8	37.3							235	41.5	277							43.5	44.6	43.9							7.37	7.37	7.4
Neonatal Saline + Keto + mAIH	37.4	37.6	37.5		37.3	37.4	37.6			271	36.1	254		208	39.3	204			45.4	44.1	46.1		43.8	43.5	43.2			7.35	7.35	7.37		7.33	7.35	7.39			140	76.6	139		115	53.6	115
	37.1	37.2	37.3		37.6	37.6	37			233	40.1	270		252	38.9	265			42.4	42.2	43.7		48.7	48.1	48.8			7.38	7.38	7.38		7.34	7.36	7.34			138	65.5	118		135	51.6	123
	37.3	37.5	37.1		37.3	37.4	37.2			230	39.6	247		268	37.1	268			44.3	44.4	44.7		48.5	49.1	48.9			7.38	7.35	7.39		7.35	7.32	7.33			123	50.4	113		105	54.3	118
	37.4	37.5	37.4		37	37	37			264	36.1	276		281	37.5	291			34.5	36.9	35.3		53.8	54	54.6			7.42	7.41	7.39		7.3	7.26	7.28			127	56.5	112		130	66.8	124
					37.8	37.7	37.5							264	43.4	258							48.1	48.2	48.2							7.35	7.3	7.33							119	54	96.1
Neonatal LPS + Keto + mAIH	37.6	37.8	37.9		37.5	37.6	37.7			224	37.8	249		288	41.6	303			43.8	43.3	43.6		50.4	51.1	49.5			7.41	7.39	7.37		7.34	7.32	7.33			119	75	110		116	84	115
	37.2	37.6	37.4		37.1	37.1	37.2			265	40.9	265		299	35.2	284			42.6	42.1	43.1		51.4	51.4	52			7.35	7.3	7.33		7.33	7.32	7.29			151	65.8	137		141	85.3	141
	37.2	37.2	37.3		37.8	37.8	37.3			312	39.7	238		241	38.3	278			42.8	40	41.8		44.8	42.7	44			7.41	7.38	7.38		7.38	7.34	7.41			130	87.5	124		118	46.8	103
	37.6	37.5	37.7		37.5	37.6	37.8			303	43.1	278		325	43.7	306			36.8	38.3	37.6		43.3	42.2	44			7.338	7.39	7.38		7.34	7.34	7.39			117	54	122		104	45.1	91.9
					37	37.4	37.9							259	35.2	209							49.8	51.5	49.3							7.32	7.26	7.28							107	70.3	110
Neonatal Saline + sAIH	37.9	37.9	37.4		37.6	37.4	37.4			284	31.2	293		264	25.9	284			36	35.3	36.8		49.7	48.4	49			7.4	7.39	7.43		7.36	7.37	7.32			139	53.7	137		148	47.6	150
	37.7	37.6	37.6		37.6	37.6	37.6			282	26.7	259		272	30.2	259			44.9	46.3	43.9		45.7	46.2	44.5			7.36	7.34	7.34		7.35	7.24	7.3			137	55.6	145		121	47.6	99.8
	37.6	37.6	37.9		37.5	37.5	37.1			284	26.3	269		276	30.4	247			39.5	40.7	40.7		50.9	50.6	51			7.39	7.37	7.38		7.35	7.31	7.3			137	71.2	140		104	69.5	109
	37.2	37.4	37.3		37.1	37	37.4			301	24.9	287		255	30.7	243			44.7	44.1	45.7		44.5	45.5	46			7.38	7.32	7.36		7.36	7.37	7.36			126	59.8	132		110	46.7	101
	37.5	37.5	37.2							325	36	201							51.5	51	51.5							7.35	7.34	7.32							127	48.1	123
Neonatal LPS + sAIH	37.6	37.6	37.9		37.2	37	37.3			284	26.3	269		231	28.9	269			39.5	40.7	40.7		51.9	52.8	53.3			7.39	7.37	7.38		7.33	7.32	7.35			119	48.5	118		126	48.1	120
	37.3	37.5	37.6		37.5	37.5	37.6			271	31.5	271		235	24	270			44.8	46	43.7		48.9	47.6	48.1			7.38	7.35	7.37		7.37	7.3	7.35			130	67.9	122		148	88.5	135
	37.4	37.3	37.7		37	37.6	37.5			296	34.9	286		297	34.6	240			47.7	47.5	49.7		42.3	39	42.3			7.33	7.32	7.33		7.36	7.28	7.37			164	85.8	148		139	50	148
	37.4	37	37.4		37.9	37.8	37.2			336	27.2	303		292	34.9	284			49.1	50.8	50.6		47.7	49.7	47.1			7.35	7.3	7.36		7.36	7.36	7.33			128	42.6	119		115	47.9	111
Neonatal Saline + Keto + sAIH	37	37	37.2		37.5	37.3	37.2			312	32.3	295		264	34.3	270			41.9	42.2	42.5		45.7	44.8	46.3			7.37	7.35	7.37		7.37	7.24	7.31			104	37.4	119		108	19.4	102
	37.5	37.5	37.7		37.5	37.7	37.6			234	29.3	233		233	27.1	253			38.2	39	38.6		52.9	51	54.2			7.42	7.37	7.4		7.35	7.29	7.33			104	24.3	99.9		147	89.4	147
	37.4	37.3	37.6		37.4	37.2	37.4			292	28.6	286		248	31.5	274			43.4	44.9	44		46.5	45.2	45			7.35	7.33	7.32		7.36	7.32	7.36			114	36.4	97.5		127	56.1	126
	37.5	37.5	38		37.7	37.6	37.2			200	31.6	198		296	32.8	259			40.9	41.7	41.1		51.3	50.7	52.5			7.41	7.4	7.4		7.32	7.31	7.29			99.8	43.2	95		115	37.4	121
	37.7	37.6	37.8		37.4	37.5	37.8			242	27.3	226		298	35	257			43.7	43.5	45.4		53	53	52.8			7.39	7.33	7.35		7.33	7.27	7.29			130	28.4	112		69.8	22.2	51.8
Neonatal LPS + Keto + sAIH	37.4	37.4	37.5		37.5	37.6	37.6			216	33.2	255		247	29.7	229			47.3	46.2	46.3		54.4	57	54.1			7.37	7.29	7.38		7.3	7.27	7.28			116	33	109		116	10	104
	37.9	37	37.4		37.3	37.3	37.2			284	31.6	222		263	32.1	253			41.7	40.3	42.4		47.7	49.2	47.6			7.36	7.33	7.39		7.33	7.31	7.3			123	24.3	125		143	68.8	159
	37.4	37.3	37.2		37.4	37.7	37.8			293	29.3	281		196	32.9	215			43.8	44.7	43.8		46.3	48.6	46.2			7.37	7.34	7.37		7.32	7.27	7.33			123	29.8	135		143	63.2	116
	37.5	37.8	37.5		37.4	37.7	37.2			235	31.5	233		261	33.2	271			38.3	38.6	38.7		51.9	50.4	51.2			7.37	7.35	7.4		7.32	7.3	7.32			120	50.5	116		135	46.5	130
	37.4	37.2	37.7		37.2	37.3	37.1			187	27	268		298	31.9	264			40.5	41	39.9		63.6	61.4	63.5			7.39	7.37	7.36		7.25	7.19	7.25			121	47.6	99.8		117	37.8	123
					37.8	37.8	37.7							204	33	241							45.7	46.5	44.6							7.36	7.36	7.35							122	34	120
Time Controls	37.8	37.9	37.5							214	227	207							49.7	48.1	48.5							7.37	7.37	7.38							109	99.4	90.3
	37.9	37.8	37.7							212	209	226							46.8	45.9	45.4							7.4	7.4	7.39							117	116	103
	37.6	37.3	37.6							276	250	216							53.6	54.3	52.1							7.28	7.29	7.3							99.9	103	103
	37.4	37.2	37.7							230	218	193							53	52.5	52.1							7.39	7.37	7.36							123	123	137
	37.7	37.7	36.9							316	309	260							44.1	42.8	43.7							7.35	7.35	7.33							99.2733	91.4	76.3
Time Controls + Keto	37.7	37.5	37.6							247	248	301							43.2	44.5	43.7							7.39	7.39	7.41							131	124	128
	37.7	37.7	37.4							268	273	266							34.7	36.9	36							7.44	7.44	7.42							135	129	135
	37.2	37.4	37.8							228	254	268							56.5	58.7	56.5							7.28	7.29	7.29							56.9	42.8	39.1
	37.3	37.2	37.4							255	248	252							41.4	41.9	40.9							7.36	7.36	7.39							139	138	141
